# Supplementary material
Source: Springer Nature journal article supplement (https://www.springermedizin.de/resource/supplementary/12876_2010_499_MOESM5_ESM.pdf/9436852)

**A.**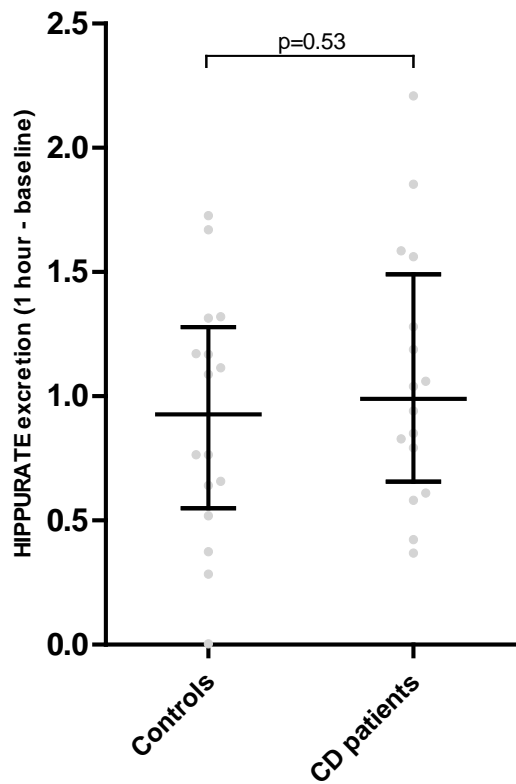**B.**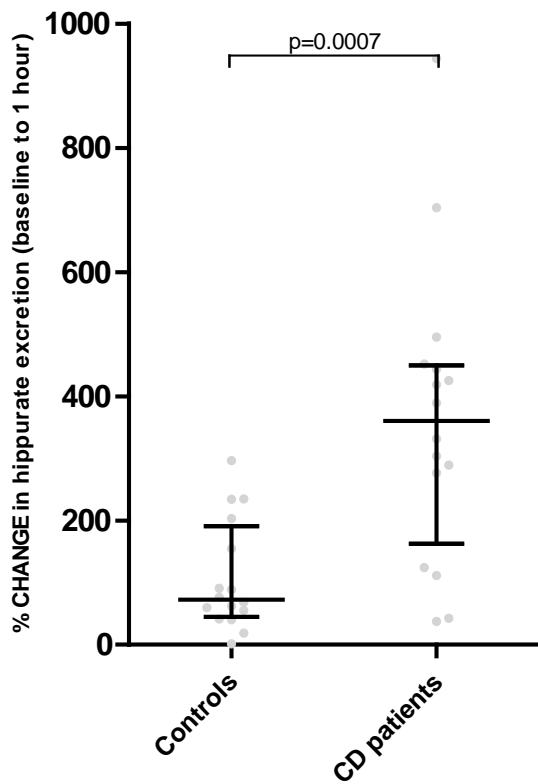

Supplement: MOESM5 [file 9436852]
